# Supplementary material
Source: ML conference proceedings conference paper supplement (https://proceedings.neurips.cc/paper_files/paper/2007/hash/94c7bb58efc3b337800875b5d382a072-Abstract.html)

# The Generalized FITC Approximation

Andrew Naish-Guzman & Sean Holden  
*Computer Laboratory, University of Cambridge*

- Sparse GP classification
  - extend SPGP/FITC (Snelson and Ghahramani, 2005) to non-Gaussian likelihoods: *diagonal plus low-rank* approximation to covariance
  - expectation propagation to refine Gaussian approximation:  $\mathcal{O}(NM^2)$
  - locate basis functions by optimizing the evidence
  - remarkable sparsity achieved for some old benchmark problems

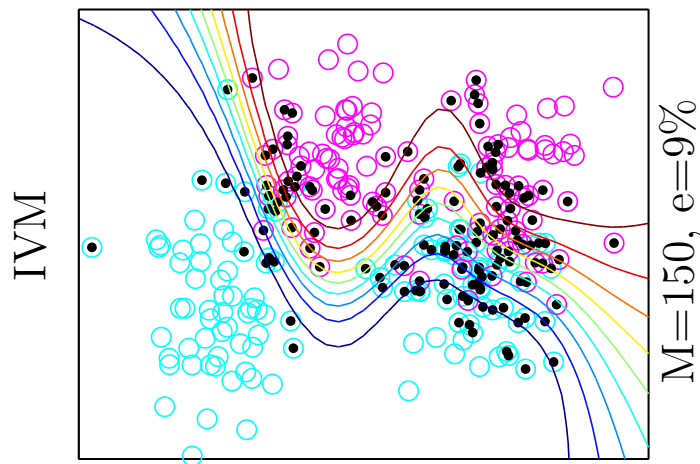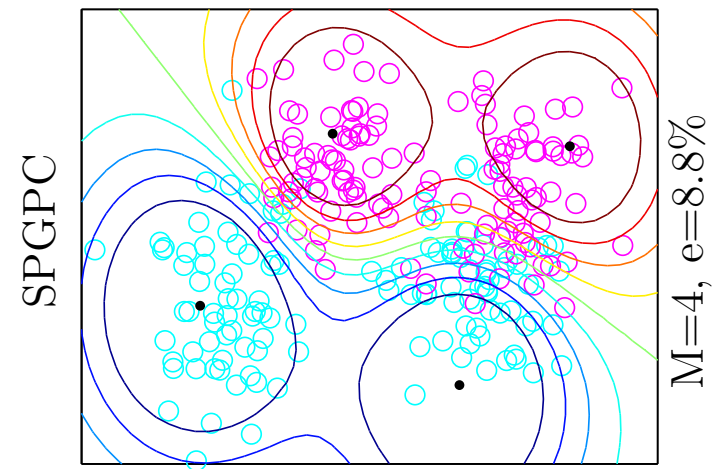

Supplement: Supplementary file [file 94c7bb58efc3b337800875b5d382a072-Supplemental.zip]
